# Supplementary material for: Heterogeneity of cell membrane structure studied by single molecule tracking
Source: Royal Society of Chemistry journal article supplement (doi:10.1039/d1fd00035g), 2021-01-01
Supplement: d1fd00035g7.pdf [file d1fd00035g7.pdf]

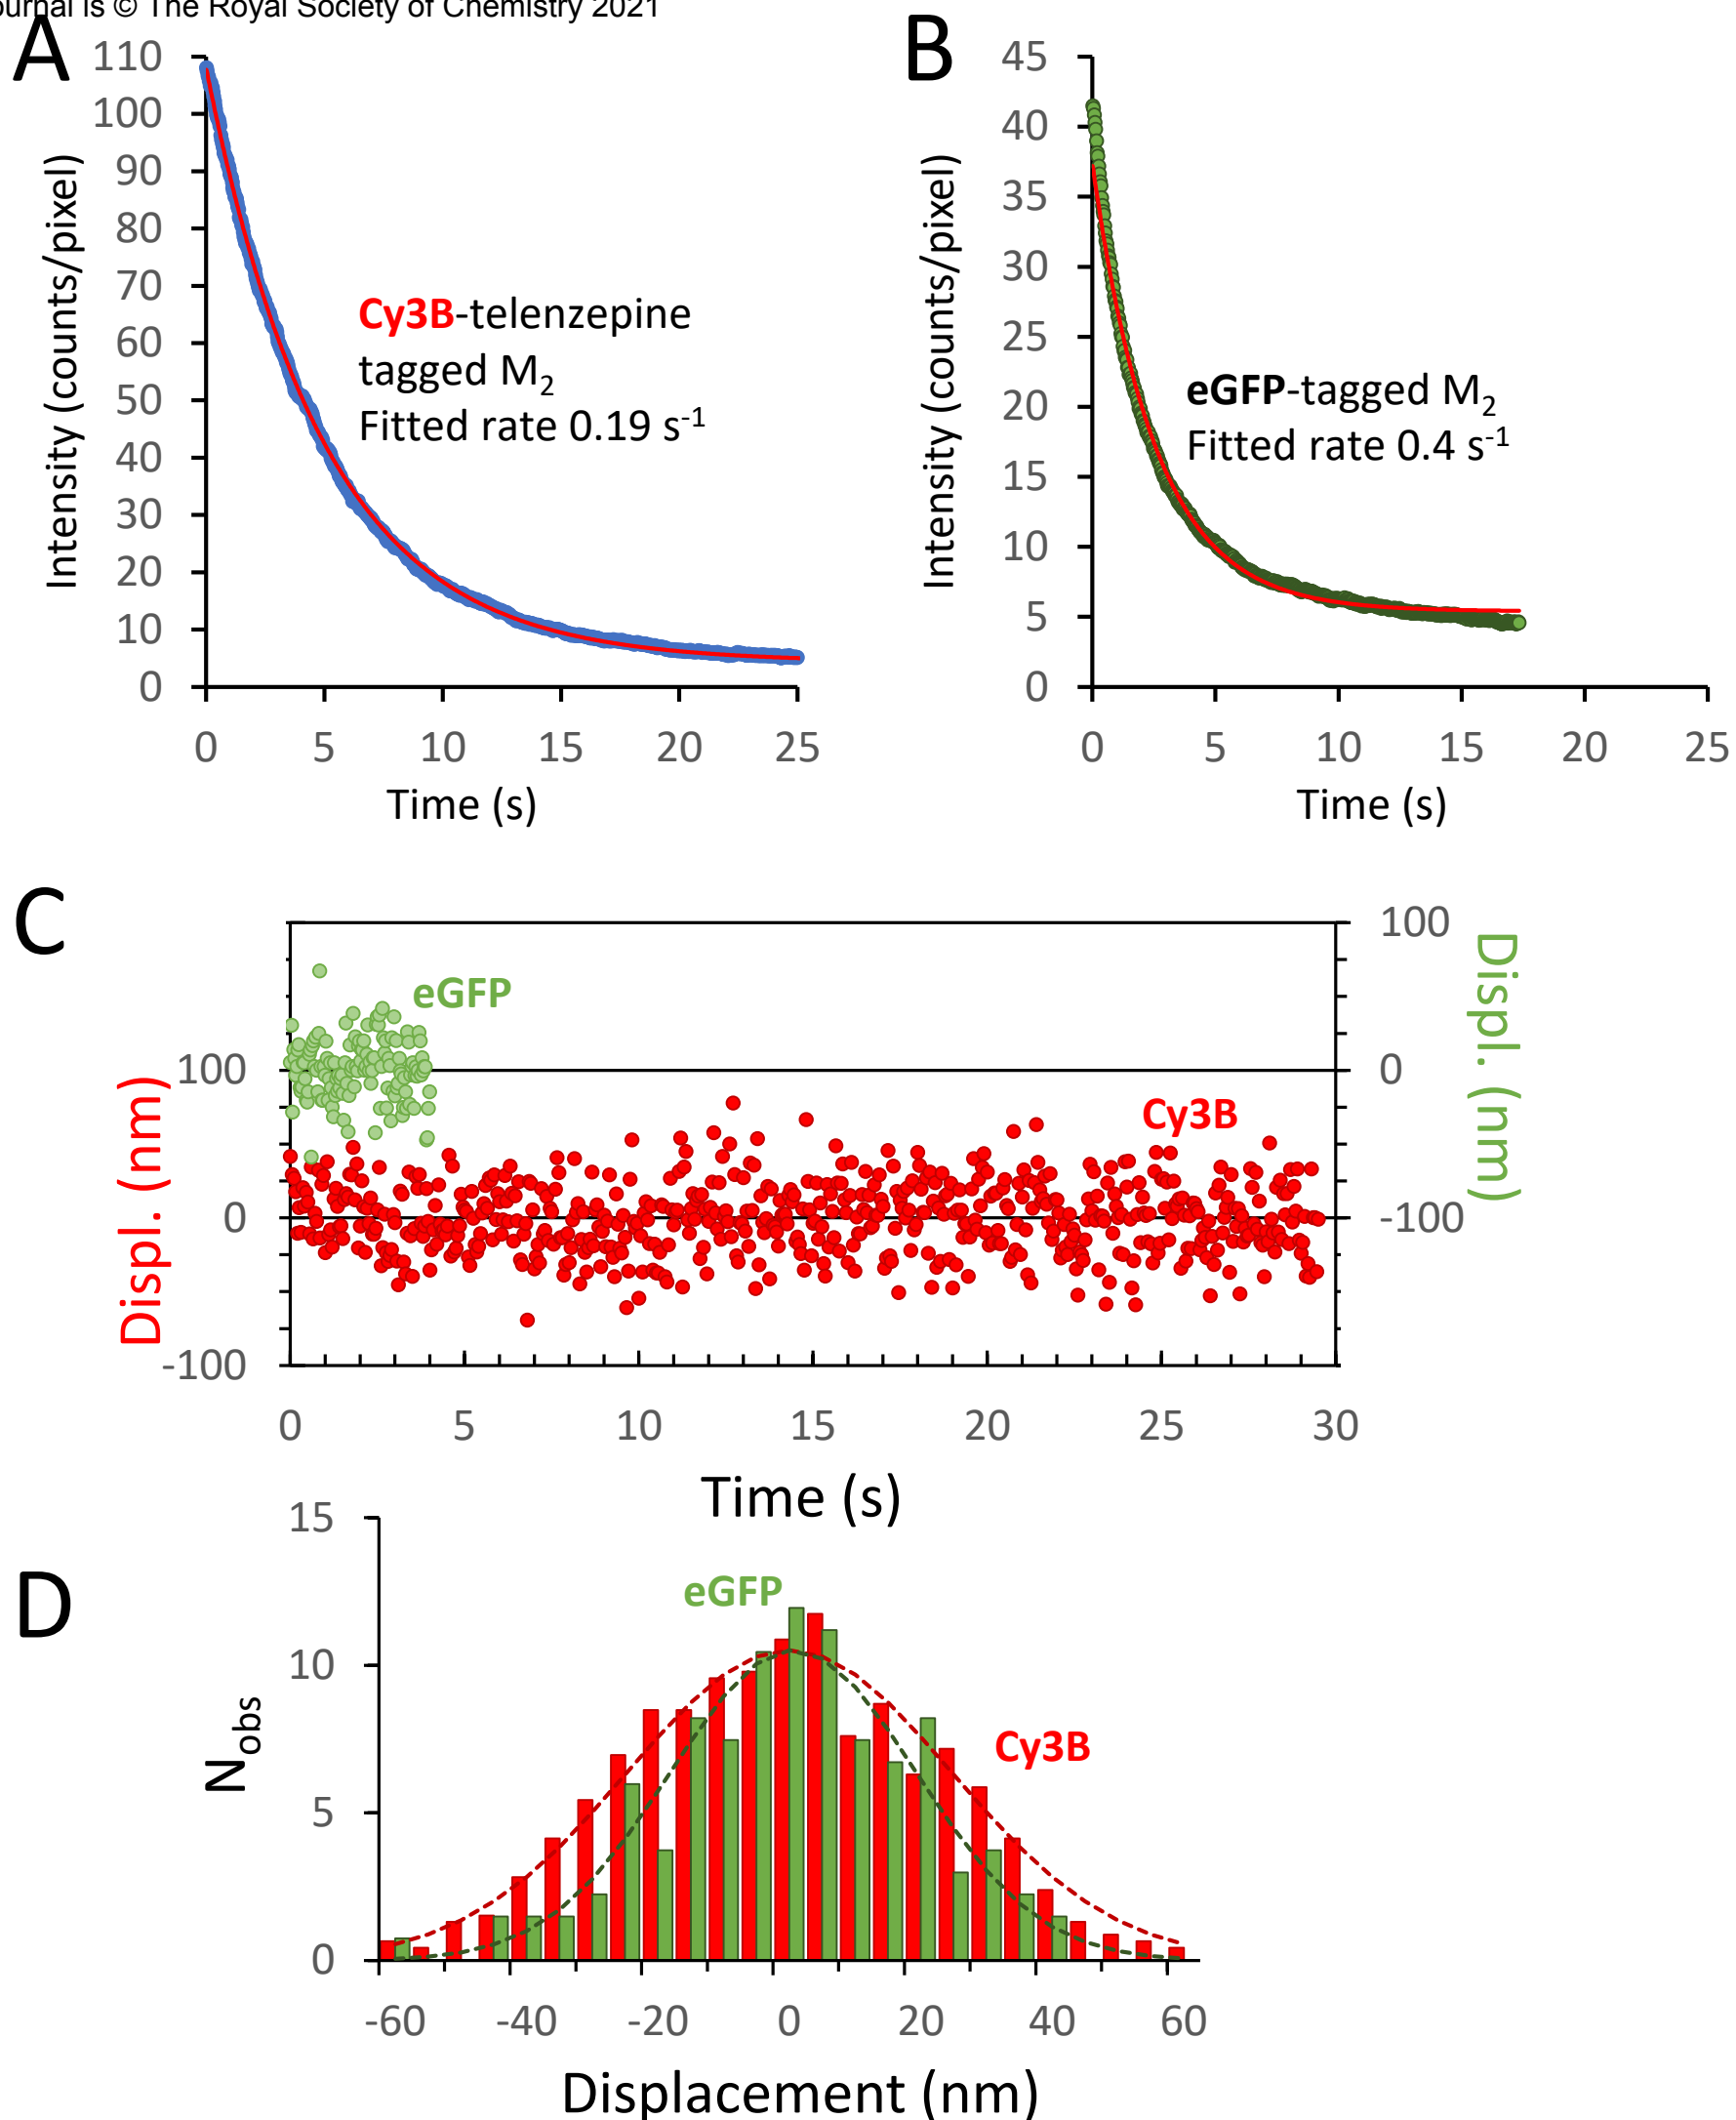

**Fig S1. Photobleaching rate and tracking accuracy:** **A)** M<sub>2</sub> receptors labelled with Cy3B-telenzepine in an HL1 cell (from Fig. 1Ai main paper). Blue dots raw data, red line fitted exponential 0.19 s<sup>-1</sup>. **B)** M<sub>2</sub> receptors tagged with eGFP in a HUVEC cell (from Fig. 2Ai, main paper) Green dots raw data; red line fitted exponential 0.4 s<sup>-1</sup>. **C)** Representative single fluorophore positional noise in a fixed HL1 cell labelled with telenzepine-cy3B (red, fluorophore bleaches after ~29s) and eGFP-tagged M2 receptors in a HUVEC cell (green, fluorophore bleaches after ~4s). Video was recorded at 30fps. Note that the positional variance is the sum of all noise sources and gives a “worst case” tracking accuracy (i.e. it includes positional noise due to mechanical vibration, etc). **D)** Histograms of fluorophore displacement values measured in (C) Gaussian fit with RMS deviations Cy3B = ±33nm; eGFP = ±26nm.

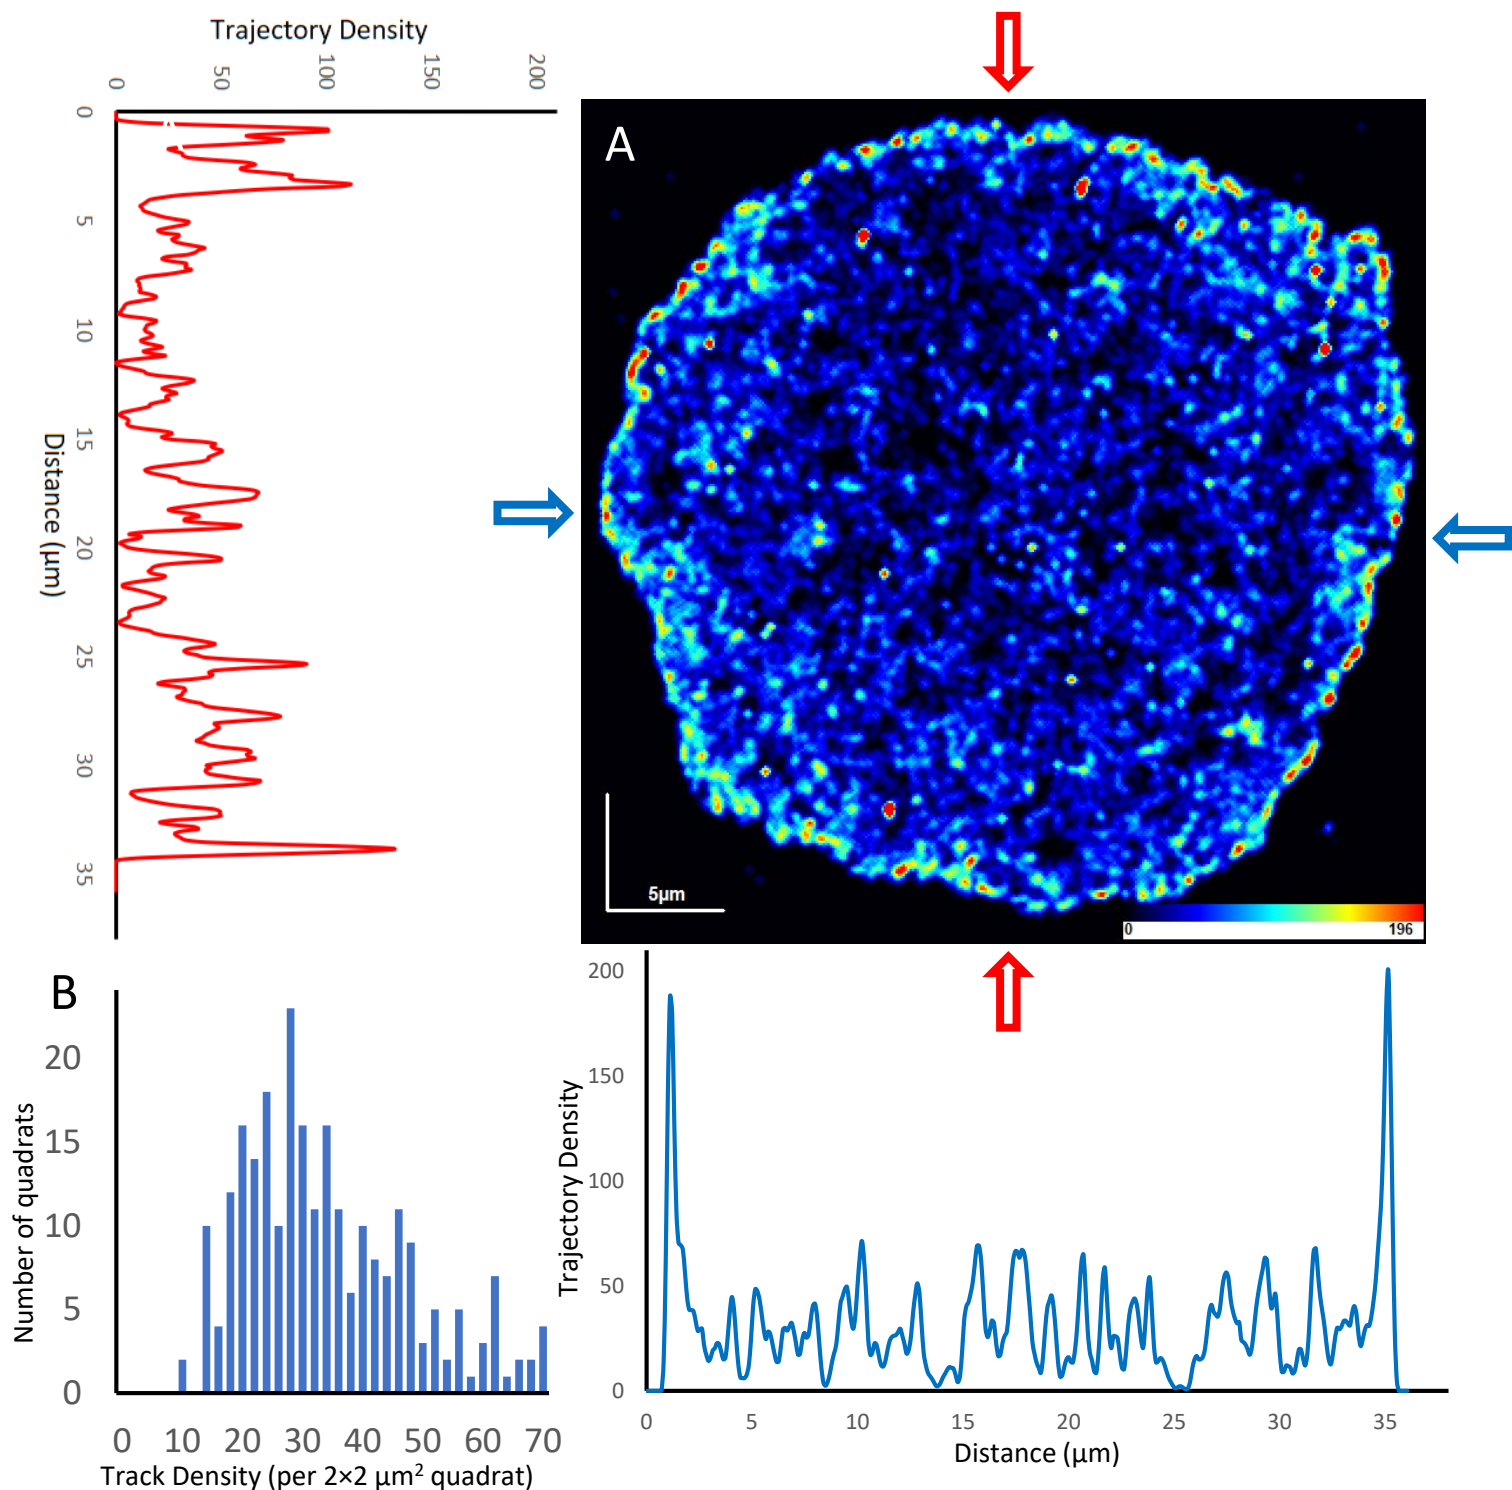

**Fig. S2.** Trajectory density analysis. **A)** Pseudo-colour trajectory density map for the cell shown in the main text **Fig. 1Ai** (Cy3B-telenzepine bound to M<sub>2</sub> receptors in an HL1 cell). Each x,y data point in the trajectory was dilated to a diameter of 0.5 μm and the pixel values were summed to represent the number of overlapping trajectories and displayed using a pseudo-colour look-up table (here in the range 0->196 overlapping tracks per pixel). Two profiles, 0.5 μm wide, were drawn through the centre of the cell and are shown at the edges of the image: blue – horizontal, red – vertical. **B)** Histogram to show the distribution of trajectory densities across the quadrat checkerboard (2x2 μm<sup>2</sup>) (see the main text **Fig. 1Aiv**). The average trajectory density was 34.6 per quadrat (note zero values were excluded).

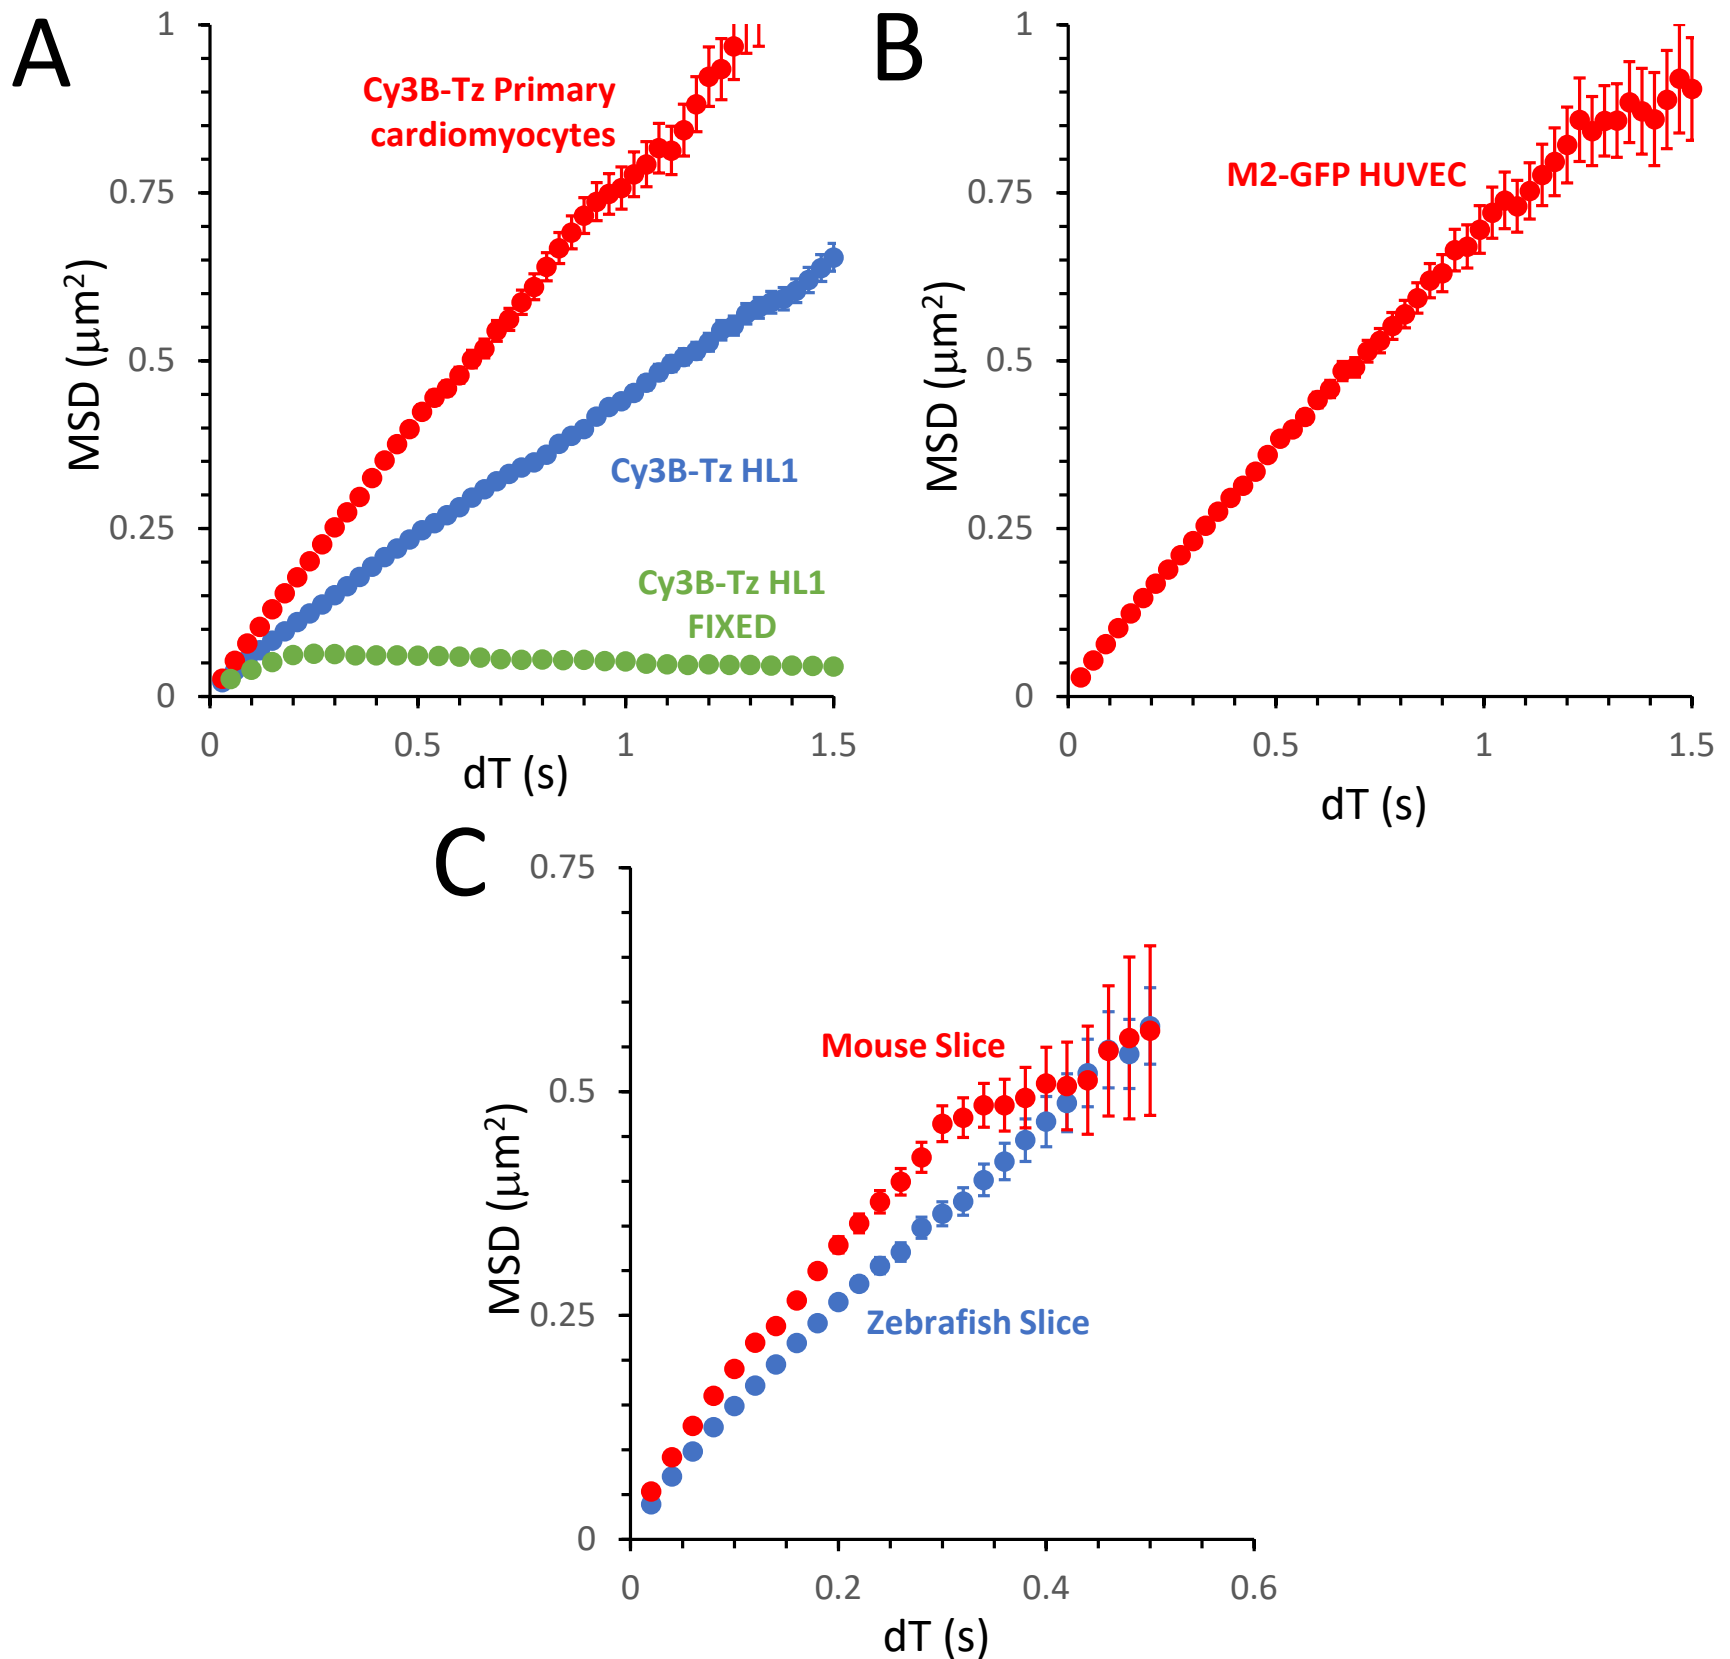

**Fig S3: Mean Squared Displacement vs. time interval (dT) plotted for all molecular trajectories for entire video records: A) Data sets for cells shown in the main text Fig. 1 B) Data sets for cells shown in the main text Fig. 2. C) Data sets for cells shown in the main text Fig. 3. (different scale from A & B). None of the plots show evidence for anomalous diffusion and they do not deviate very significantly from a straight-line relationship; Except panel (A) “Green” data for the chemically-fixed HL1 cell.**

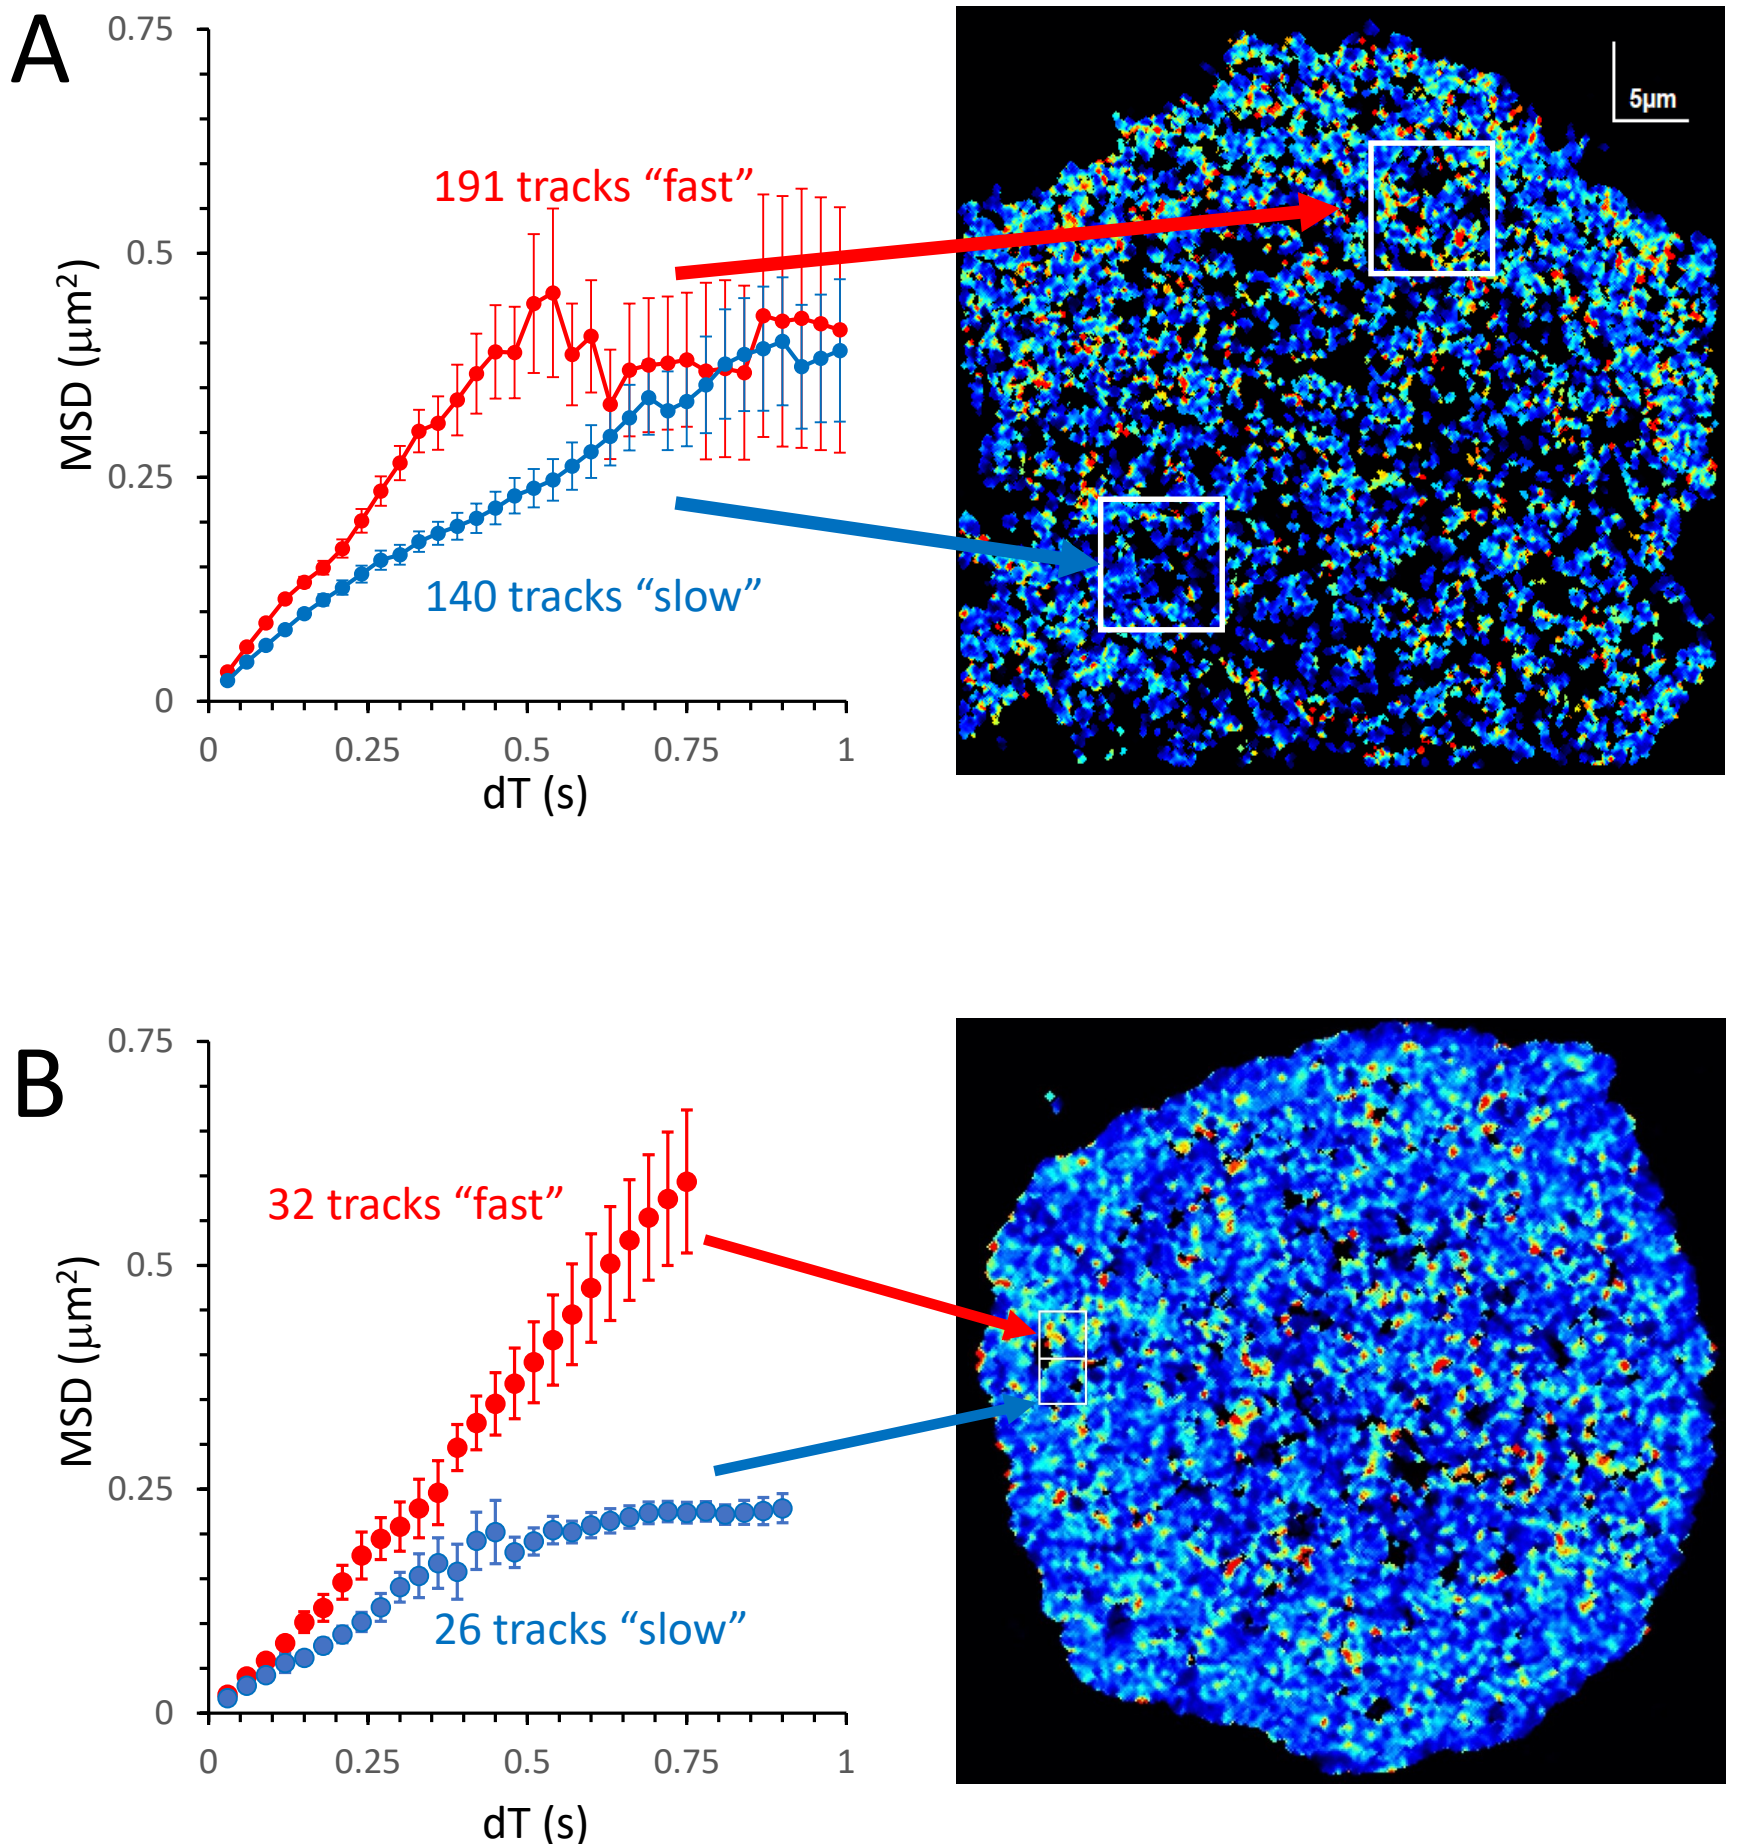

**Fig. S4: Local variation in mean  $D_{lat}$  values are further analysed by inspecting the MSD vs dT plots for representative “fast” and “slow” quadrat regions: A) HUVEC cell. Left Panel:** MSD-dT plot shows significant differences in  $M_2$ -GFP mobility in two separate  $8 \times 8 \mu\text{m}^2$  regions of the cell marked by white rectangles on the right panel. The measured  $D_{lat}$  (fitted slope of MSD-dT plot, first 20 data points) was  $0.208 \mu\text{m}^2 \text{s}^{-1}$  (191 trajectory averaged, red quadrat) and  $0.111 \mu\text{m}^2 \text{s}^{-1}$  (140 trajectory averaged, blue quadrat). **Right Panel:** The enlarged heat map (Fig. 2iii main paper) showing locally averaged  $D_{lat}$  values. Two quadrats with substantially different viscosity values marked by the white rectangles. **B) HL1 cell. Left Panel:** MSD-dT plot shows significant differences in Cy3BTz labelled  $M_2$  receptor mobility in two separate  $2 \times 2 \mu\text{m}^2$  regions of the cell marked by white rectangles on the right panel. The measured  $D_{lat}$  (fitted slope of MSD-dT plot, first 20 data points) was  $0.192 \mu\text{m}^2 \text{s}^{-1}$  (32 trajectory averaged, red) and  $0.113 \mu\text{m}^2 \text{s}^{-1}$  (26 trajectory averaged, blue). Note the slow trajectories show anomalous diffusion (indicated by downward curvature). **Right Panel:** The enlarged heat map showing locally averaged  $D_{lat}$  values. The two respective quadrats with substantially different viscosity values are marked by white rectangles.

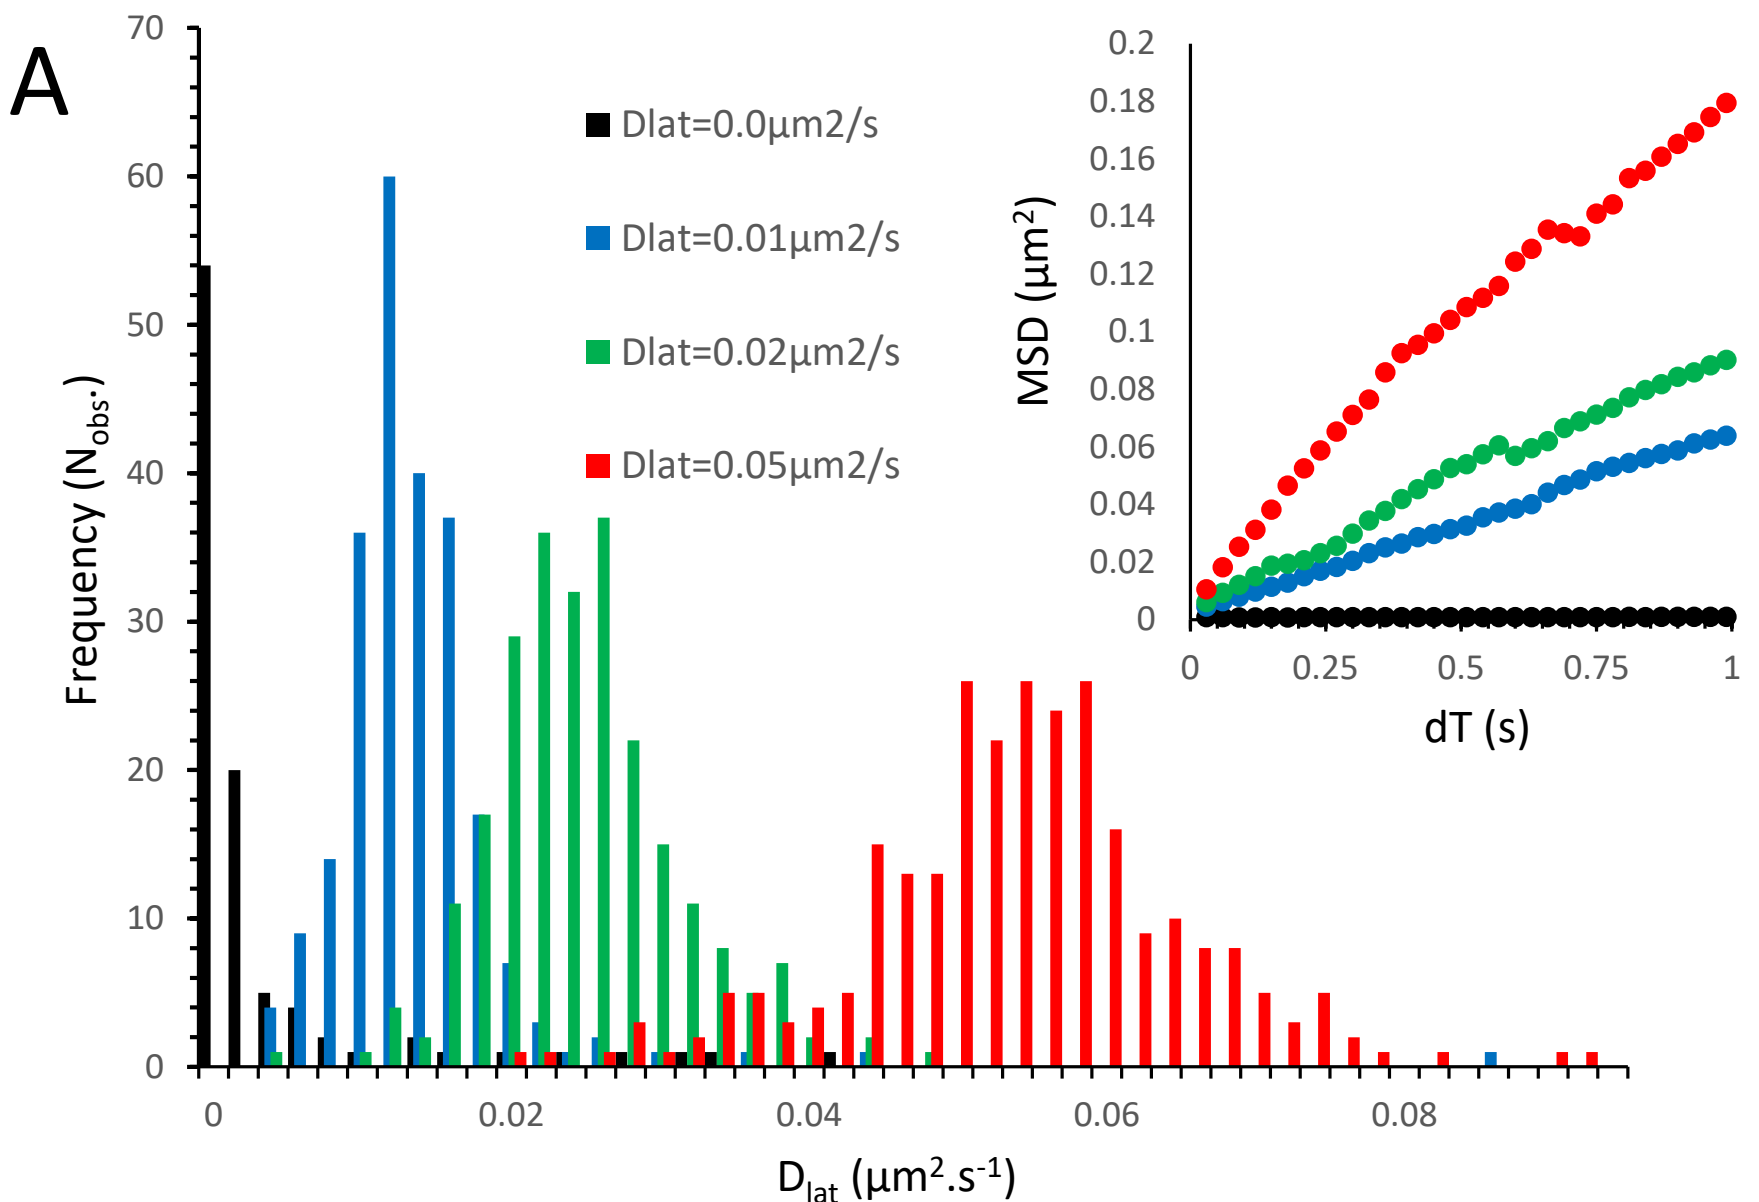

**Fig. S5. Computer Simulations of single molecule diffusion with extremely low values of  $D_{lat}$ :** Video data was simulated using an object-based, *Monte Carlo* random walk for fluorophores that have realistic intensity and signal-to-noise. The mock videos were then tracked and analysed in the same way as the real data sets from our TIRF imaging experiments. The  $D_{lat}$  quadrat mapping shows the distribution of mean  $D_{lat}$  values are normally distributed (i.e. obey the central limit theorem) except for the very slowest example which is dominated by tracking noise and where data under-sampling and histogram binning lead to artificial truncation near zero (black data).
